# Supplementary material for: GLI2-dependent c-MYC upregulation mediates resistance of pancreatic cancer cells to the BET bromodomain inhibitor JQ1
Source: PubMed Central journal article supplement (PMC4452877; doi:10.1038/srep09489), 2015-03-25

**GLI2-dependent c-MYC upregulation mediates resistance of pancreatic cancer cells to the BET bromodomain inhibitor JQ1**

Krishan Kumar<sup>1,3,5</sup>, Sania S. Raza<sup>1,5</sup>, Lawrence M. Knab<sup>2,5</sup>, Christina R. Chow<sup>1,4</sup>, Benjamin Kwok<sup>1</sup>, David J. Bentrem<sup>2,3,4</sup>, Relja Popovic<sup>1</sup>, Kazumi Ebine<sup>1,3</sup>, Jonathan D. Licht<sup>1,4</sup>, Hidayatullah G. Munshi<sup>1,3,4,\*</sup>

Departments of <sup>1</sup>Medicine and <sup>2</sup>Surgery, Feinberg School of Medicine, Northwestern University; <sup>3</sup>Jesse Brown VA Medical Center; and <sup>4</sup>The Robert H. Lurie Comprehensive Cancer Center of Northwestern University, Chicago, IL 60611.

<sup>5</sup>Co-first author

**Supplementary Material**

## SUPPLEMENTARY FIGURE LEGENDS

### Figure S1: **JQ1-resistant pancreatic cancer cells are resistant to the BET inhibitor I-BET151.**

Parental (CD18-P) and JQ1-resistant (CD18-JQ1<sup>R</sup>) pancreatic cancer cells were grown in three-dimensional collagen gels and fresh serum-containing medium supplemented with DMSO or I-BET151 was added every other day for 4 days. The effect on colony size was examined by phase contrast microscopy, and size of the individual colonies measured. \*,  $p < 0.05$ . The results are representative of three independent experiments.

### Figure S2: **JQ1-resistant pancreatic cancer cells demonstrate decreased cell-matrix adhesion associated with increased ZEB1 expression.**

(a) CD18-P and CD18-JQ1<sup>R</sup> cells were seeded onto collagen I (Col I)-coated tissue culture plates and allowed to adhere at 37°C for 10 minutes. Adherent cells were photographed and counted. (b) CD18-P and CD18-JQ1<sup>R</sup> cells were analyzed for collagen-binding  $\alpha$ 2- and  $\beta$ 1-integrin expression by FACS analysis. (c) CD18-P and CD18-JQ1<sup>R</sup> cells plated for 24 hours onto collagen-coated tissue culture plates were analyzed for pFAK(Y397) and total FAK by Western blotting. (d, e) CD18-JQ1<sup>R</sup> cells growing on tissue culture plastic were transfected with control siRNA (siCtrl) or ZEB1-specific siRNA (siZEB1) for 72 hours. The transfected cells were re-plated onto collagen I (Col I)-coated tissue culture plates and allowed to adhere at 37°C for 10 minutes. Adherent cells were photographed and counted. The effect of ZEB1 knockdown on collagen-binding  $\alpha$ 2- and  $\beta$ 1-integrin expression was evaluated by FACS analysis. \*,  $p < 0.05$ . The results are representative of three independent experiments.

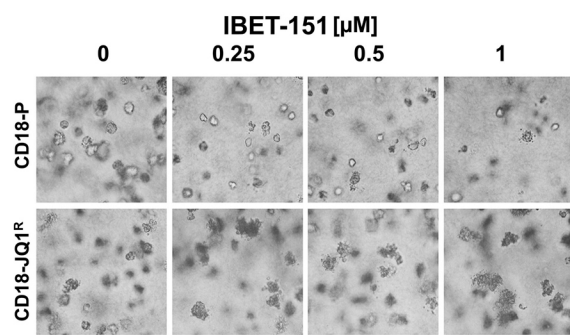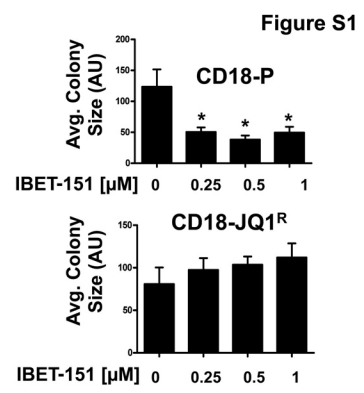

Figure S2

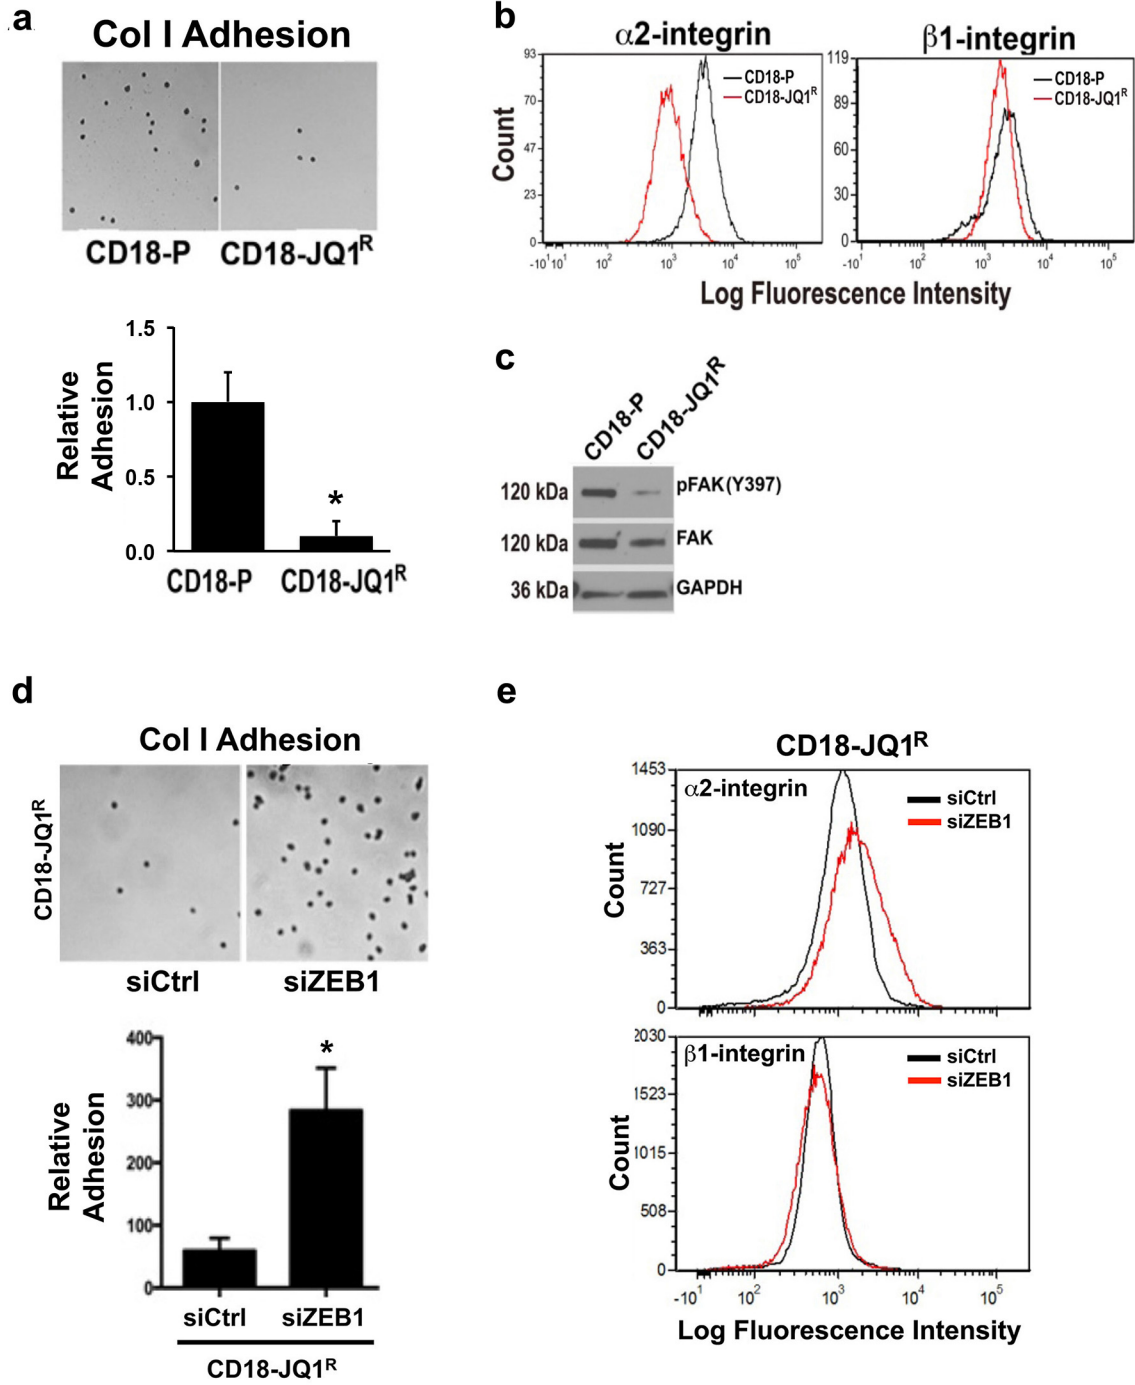

Supplement: srep09489-s1.pdf [file srep09489-s1.pdf]
